# Supplementary material
Source: PubMed Central journal article supplement (PMC10233452)
Supplement: jamacardiol-e231229-s002.pdf [file jamacardiol-e231229-s002.pdf]

## Data Sharing Statement

Yu. Association of Circulating Cardiomyocyte Cell-Free DNA With Cancer Therapy–Related Cardiac Dysfunction in Patients Undergoing Treatment for ERBB2-Positive Breast Cancer. *JAMA Cardiol.* Published May 31, 2023. doi:10.1001/jamacardio.2023.1229

### Data

**Data available:** No
